# Supplementary material
Source: PubMed Central journal article supplement (PMC6145847)
Supplement: NIHMS984895-supplement-SI.pdf [file NIHMS984895-supplement-SI.pdf]

Copyright WILEY-VCH Verlag GmbH & Co. KGaA, 69469 Weinheim, Germany, 2013.

# ADVANCED FUNCTIONAL MATERIALS

## Supporting Information

for *Adv. Funct. Mater.*, DOI: 10.1002/adfm.201301837

**Rational Assembly of Optoplasmonic Hetero-nanoparticle  
Arrays with Tunable Photonic–Plasmonic Resonances**

*Yan Hong, Yue Qiu, Tianhong Chen, and Björn M. Reinhard\**

## Supporting Information

### Rational Assembly of Optoplasmonic Hetero-Nanoparticle-Arrays with Tunable Photonic- Plasmonic Resonances

By Yan Hong, Yue Qiu, Tianhong Chen, and Björn M. Reinhard\*

[\*] Y. Hong, Y. Qiu, T. Chen, Prof. B. M. Reinhard

Department of Chemistry and The Photonics Center, Boston University,  
Boston, MA 02215, USA

E-mail: ([bmr@bu.edu](mailto:bmr@bu.edu))

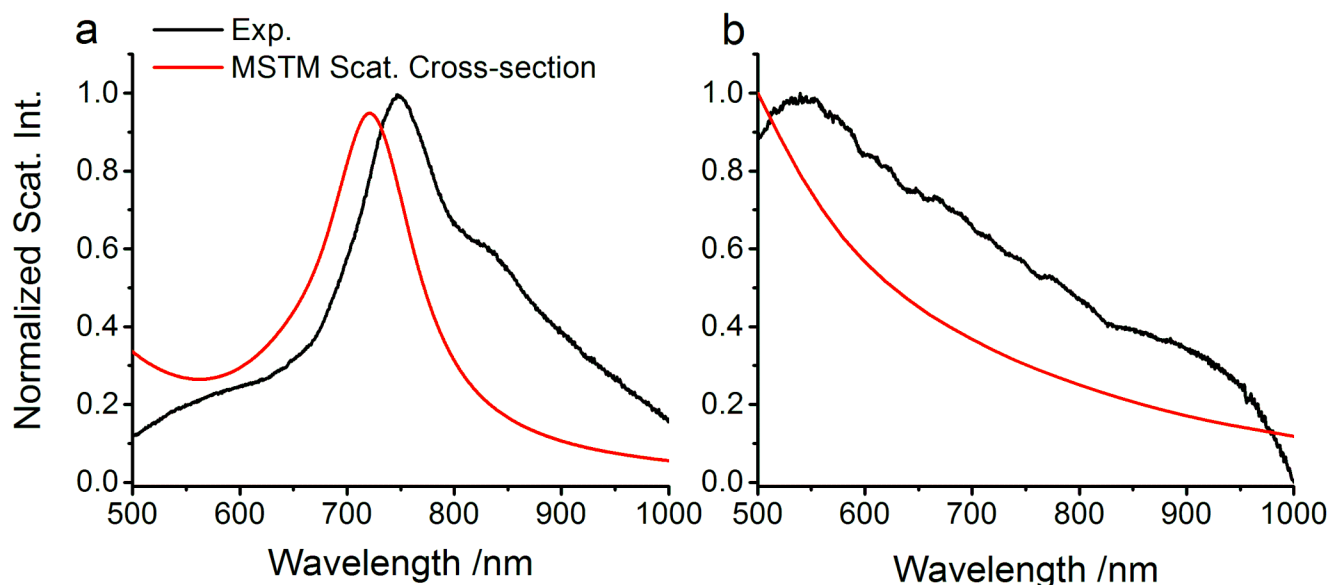

**Figure. S1.** Experimental and MSTM-simulated far field spectra of optoplasmonic array components. a) Spectra of Au clusters. For the MSTM result, a single Au trimer as described in the Methods section was simulated. b) Spectra of TiO<sub>2</sub> NP. The black curve represents the spectrum of an individual TiO<sub>2</sub> NP immobilized on glass substrate. The red curve is the MSTM simulation result for one  $n_r = 1.80$  sphere (Diameter = 250nm) embedded in a medium with  $n_r = 1.24$ .

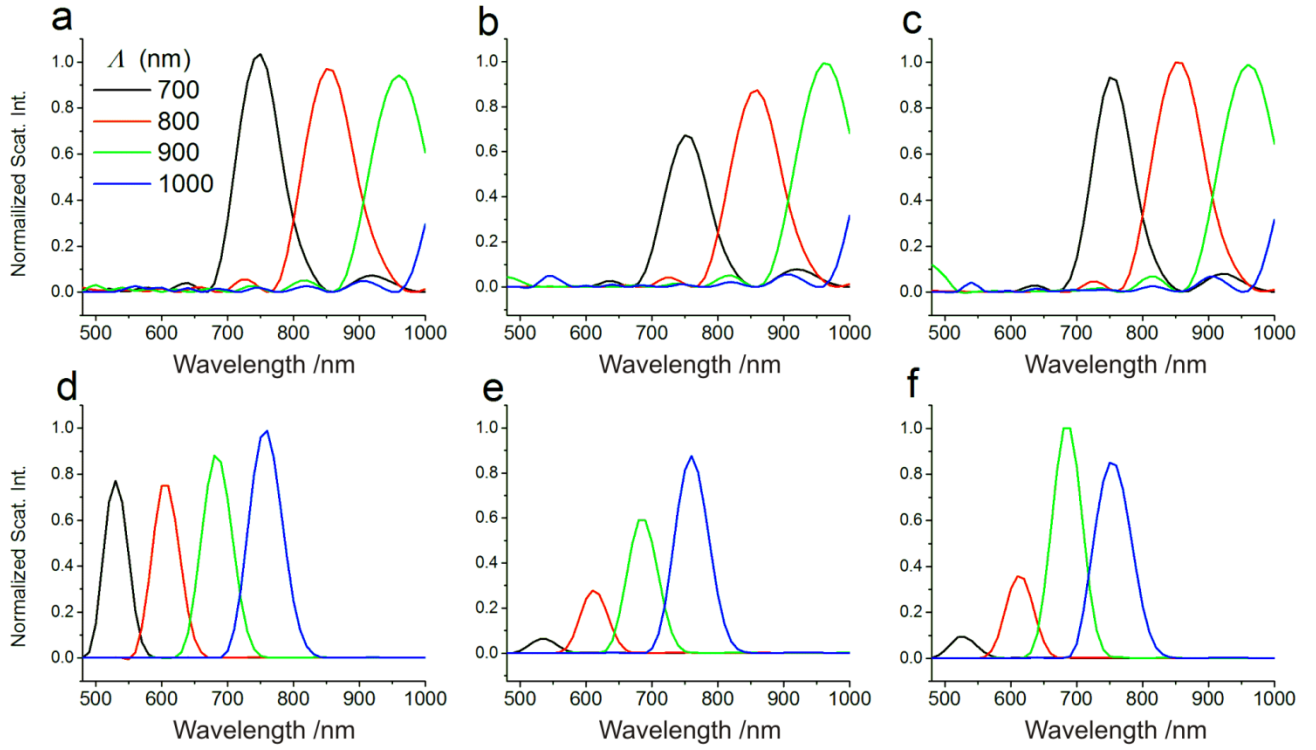

**Figure S2:** MSTM-simulated far-field scattering spectra of  $8 \times 8$  arrays with  $\theta^{det} = 0^\circ$  and  $\varphi^{det} = 0^\circ$ . (a),(d) Au NP cluster array (NCA). (b),(e)  $\text{TiO}_2$  NP array. (c),(f) Optoplasmonic array. (a-c) were obtained for  $\theta^{inc} = 60^\circ$  and  $\varphi^{inc} = 0^\circ$  to simulate the (1,0) mode. (d-f) were obtained for  $\theta^{inc} = 60^\circ$  and  $\varphi^{inc} = 45^\circ$  to simulate the (1,1) mode.

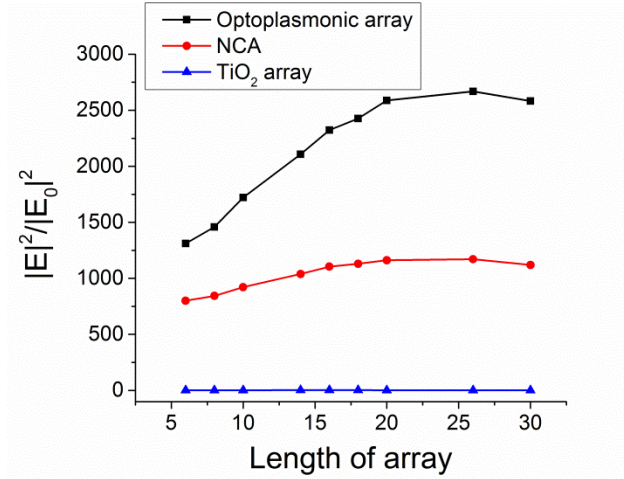

**Figure S3:** MSTM-simulated near field intensities of the hottest point as a function of the array length (number of binding sites along one axis) in an optoplasmonic array (black), 60 nm Au NP trimer NCA (red), and  $\text{TiO}_2$  NP array (blue).
